# Supplementary material for: Achieving favourable oxygen electrocatalytic activity with compositionally complex metal molybdates
Source: Royal Society of Chemistry journal article supplement (doi:10.1039/d3se00736g), 2023-01-01
Supplement: d3se00736g1.pdf [file d3se00736g1.pdf]

## Supporting information

### Realizing Favourable Oxygen Electrocatalytic Activity with Compositionally Complex Metal Molybdates

Hemanth Kumar Beere, † Pranav Kulkarni, ‡ Uday Narayan Maiti, †† R Geetha Balakrishna, †  
Priyam Mukherjee, †† Hyun Young Jung, ‡ Ketaki Samanta<sup>¶</sup> and Debasis Ghosh<sup>†, ‡\*</sup>

<sup>†</sup>*Centre for Nano and Material Sciences, Jain (Deemed-to-be University), Jain Global Campus,  
Kanakapura, Bangalore, Karnataka, India – 562112*

<sup>††</sup>*Department of Physics, Indian Institute of Technology Guwahati, Guwahati, Assam, 781039  
India*

<sup>‡</sup>*Department of Energy Engineering, Gyeongsang National University, Jinju-si, Gyeongnam  
52725, South Korea*

<sup>¶</sup>*Department of Materials Engineering, Indian Institute of Science, Bangalore, Karnataka  
560012, India.*

**\*Corresponding authors:**

DG: [g.debasis@jainuniversity.ac.in](mailto:g.debasis@jainuniversity.ac.in); [debasisghosh88@gmail.com](mailto:debasisghosh88@gmail.com)

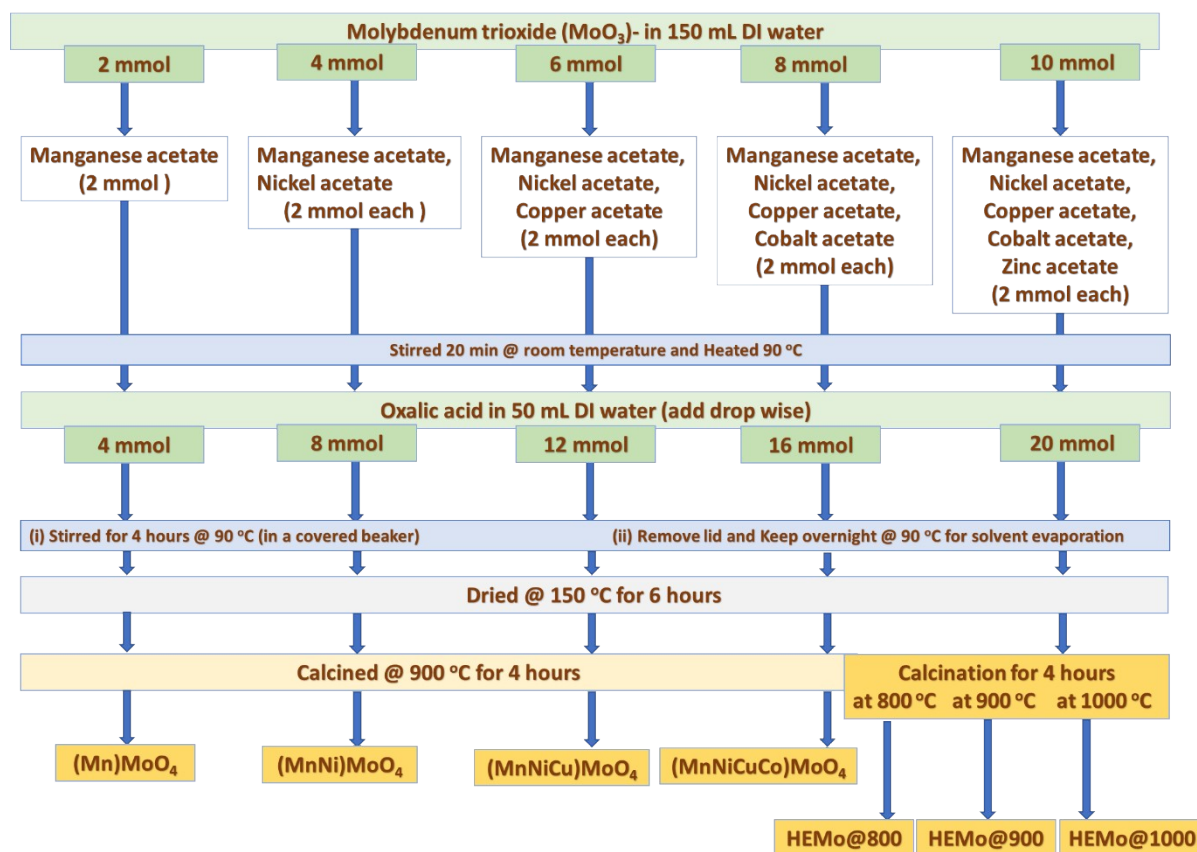

**Figure S1.** Schematic illustration of the synthesis process of metal molybdates.

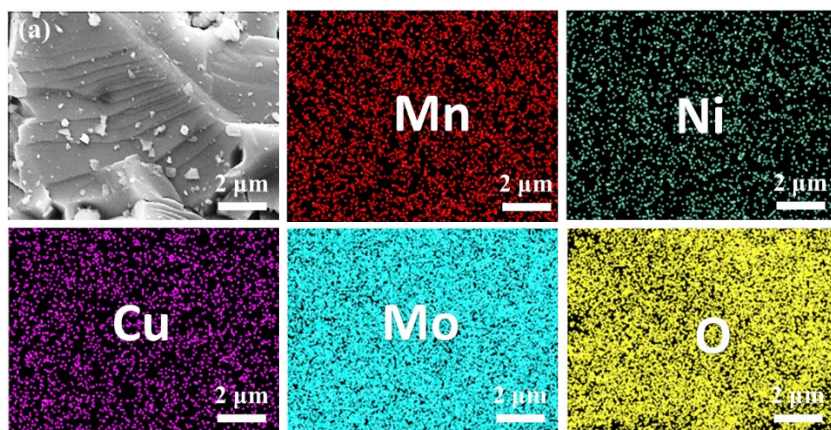

**Figure S2.** EDX elemental mapping of  $(\text{MnNiCu})\text{MoO}_4$ : mapping was carried out on the whole area of Figure (a), and the surface mapping of Mn, Ni, Cu, Mo, and O elements with corresponding % are shown.

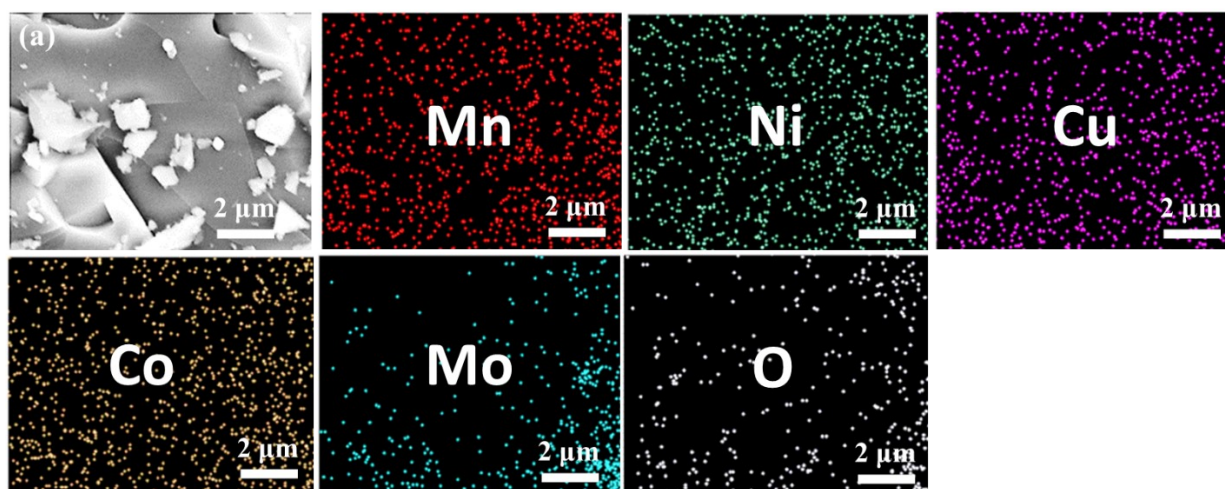

**Figure S3.** EDX elemental mapping of  $(\text{MnNiCuCo})\text{MoO}_4$ : mapping was carried out on the whole area of Figure (a), and the surface mapping of Mn, Ni, Cu, Co, Mo, and O elements with corresponding % are shown.

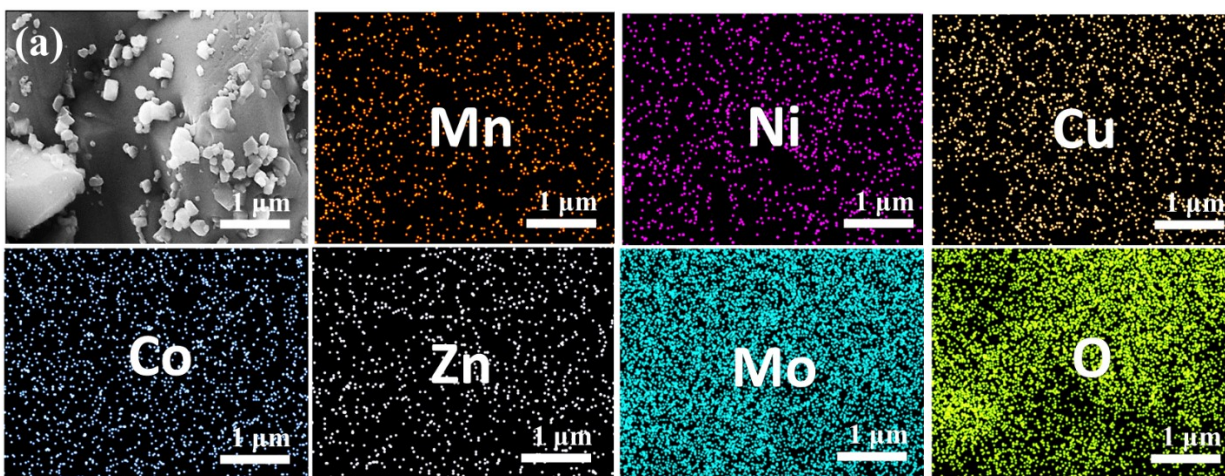

**Figure S4.** EDX elemental mapping of HEMo@800: mapping was carried out on the whole area of Figure (a), and the surface mapping of Mn, Ni, Cu, Co, Zn, Mo, and O elements with corresponding % are shown.

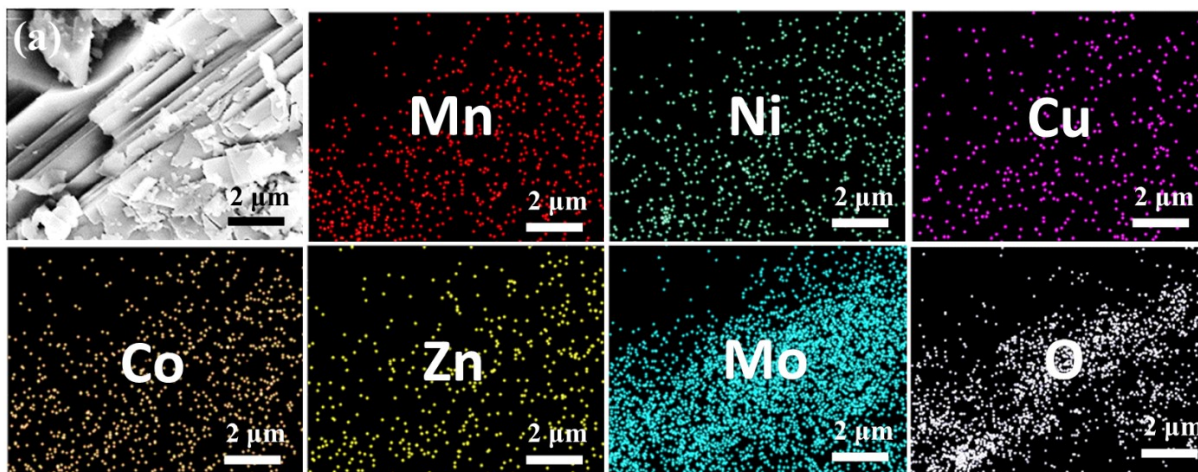

**Figure S5.** EDX elemental mapping of HEMo@1000: mapping was carried out on the whole area of Figure (a), and the surface mapping of Mn, Ni, Cu, Co, Zn, Mo, and O elements with corresponding % are shown.

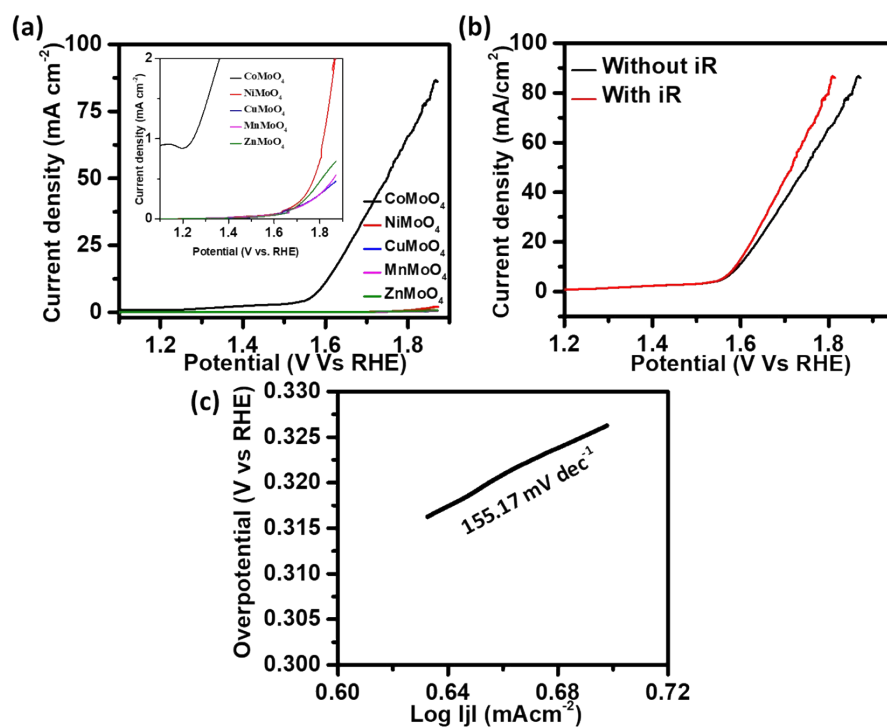

**Figure S6.** (a) Comparison of LSV curves for different mono metal molybdates; (b) With and without *iR* corrected OER polarization curves of CoMoO<sub>4</sub> and (c) Tafel plot of CoMoO<sub>4</sub> obtained from *iR* corrected LSV plot.

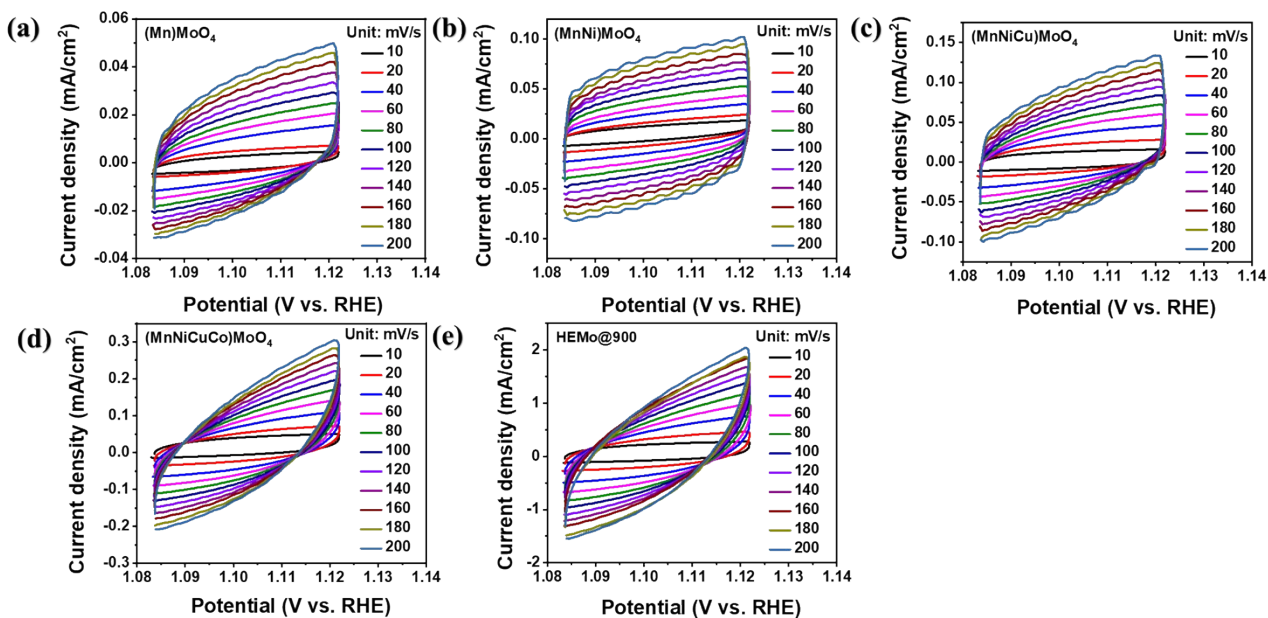

**Figure S7.** Non-faradaic CV curves of (Mn)MoO<sub>4</sub> (a), (MnNi)MoO<sub>4</sub> (b), (MnNiCu)MoO<sub>4</sub> (c), (MnNiCuCo)MoO<sub>4</sub> (d), and HEMo@900 (e) at different scan rates.

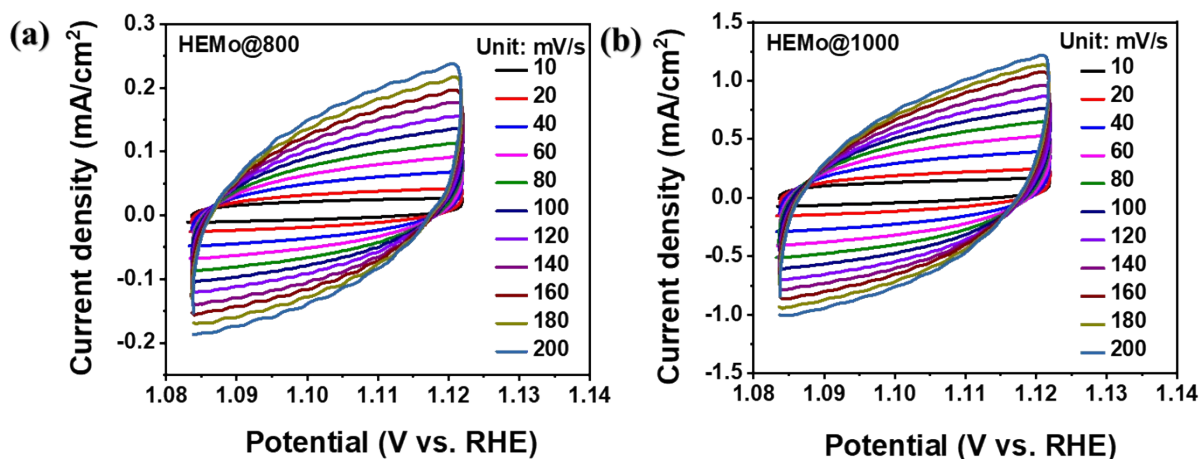

**Figure S8.** Non-faradaic CV curves of HEMo@800 (a) and HEMo@1000 (b) at different scan rates.

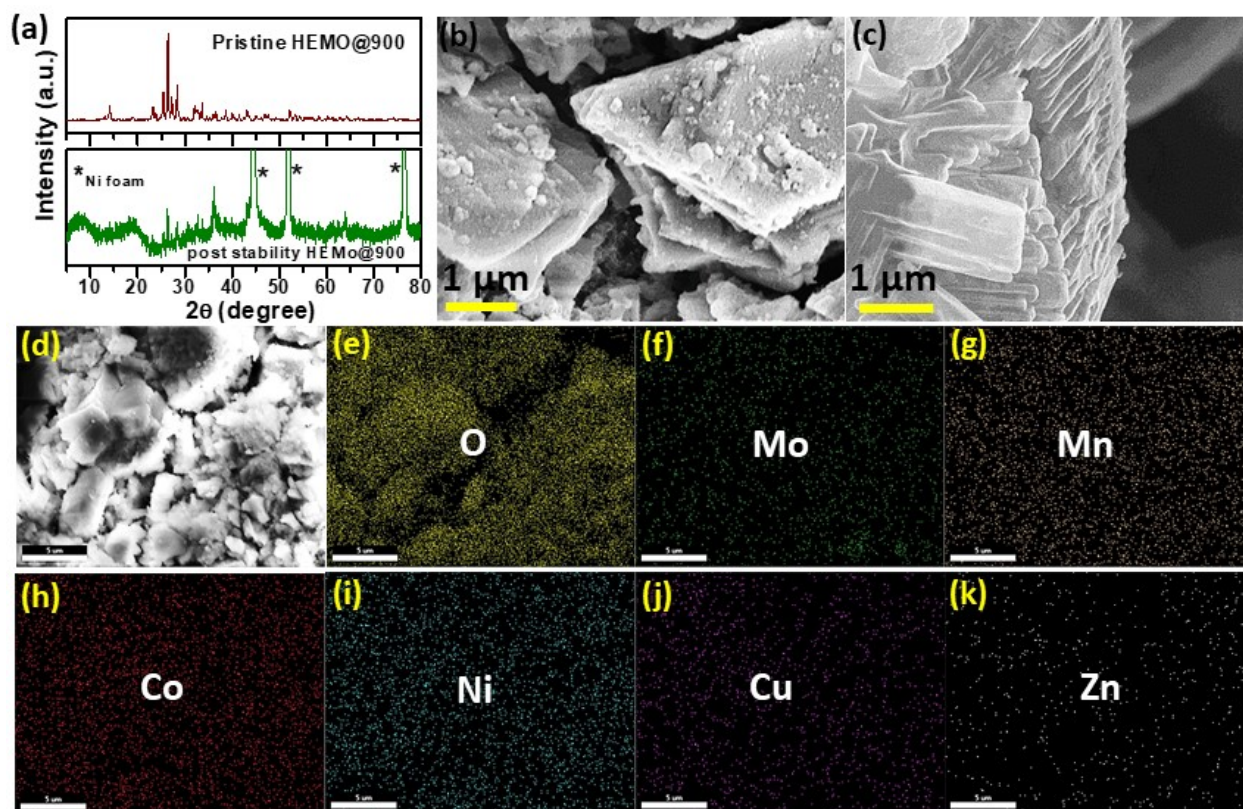

**Figure S9** Post stability study of HEMo@900 electrocatalyst: (a) XRD pattern; FESEM images of the HEMo@900 at different magnifications (b-c) and EDX elemental mapping of image (d) showing the uniform distribution of the elements (e) O, (f) Mo, (g) Mn, (h) Co, (i) Ni, (j) Cu and (k) Zn.

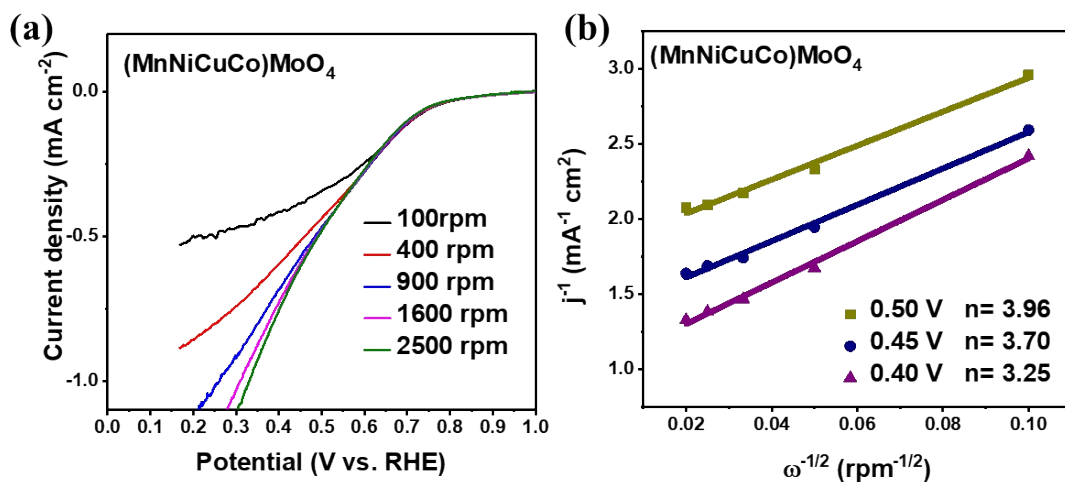

**Figure S10:** ORR polarization plots of the (MnNiCuCo)MoO<sub>4</sub> in O<sub>2</sub> saturated 1 M KOH at different RPM values, and (b) K-L plot as obtained from the ORR polarization curves.

**Table S1:** Reflections (hkl) and corresponding 2 $\theta$  diffraction angles.

|                     | JCPDS<br>01-072-<br>0285 -<br>MnMo<br>O <sub>4</sub> | MnMo<br>O <sub>4</sub> | (MnNi<br>)<br>MoO <sub>4</sub> |                     | JCPDS<br>00-021-<br>0868-<br>CoMoO<br><sub>4</sub> | (MnNiCu<br>)<br>MoO <sub>4</sub> | (CoMn<br>NiCu)<br>MoO <sub>4</sub> | HEMo<br>@<br>900       | HEMo<br>@<br>1000      | HEMo<br>@<br>800       |
|---------------------|------------------------------------------------------|------------------------|--------------------------------|---------------------|----------------------------------------------------|----------------------------------|------------------------------------|------------------------|------------------------|------------------------|
| Reflection<br>(hkl) | 2 $\theta$<br>(degree)                               | 2 $\theta$<br>(degree) | 2 $\theta$<br>(degree)         | Reflection<br>(hkl) | 2 $\theta$<br>(degree)                             | 2 $\theta$<br>(degree)           | 2 $\theta$<br>(degree)             | 2 $\theta$<br>(degree) | 2 $\theta$<br>(degree) | 2 $\theta$<br>(degree) |
| (110)               | 12.801                                               | 12.7868                | 13.074                         | (001)               | 13.204                                             | 13.1466                          | 13.1849                            | 13.1871                | 13.139                 | 13.1241                |
| (-201)              | 18.726                                               | 18.721                 | 18.959<br>9                    | (-<br>201)          | 19.071                                             | 18.9318                          | 18.9597                            | 18.8974                | 18.802<br>7            | 18.7981                |
| (021)               | 22.73                                                | 22.7407                | 23.118<br>8                    | (021)               | 23.329                                             | 23.1854                          | 23.2932                            | 23.2781                | 23.242<br>6            | 23.2279                |
| (201)               | 24.709                                               | 24.6659                | 25.183<br>1                    | (201)               | 25.502                                             | 25.358                           | 25.4632                            | 25.397                 | 25.350<br>5            | 25.385                 |
| (220)               | 25.766                                               | 25.7602                | 26.260<br>2                    | (002)               | 26.507                                             | 26.3487                          | 26.4703                            | 26.3876                | 26.344<br>8            | 26.3628                |
| (002)               | 25.969                                               | 25.9599                | 27.010<br>1                    | (-<br>112)          | 27.25                                              | 27.1444                          | 27.2242                            | 27.1873                | 27.116<br>7            | 27.168                 |



|        |        |         |             |            |        |         |         |         |             |         |
|--------|--------|---------|-------------|------------|--------|---------|---------|---------|-------------|---------|
| (-112) | 26.685 | 26.7079 | 27.332<br>2 | (-<br>311) | 28.401 | 28.3439 | 28.4231 | 28.3455 | 28.378<br>4 | 28.3194 |
| (-311) | 27.766 | 27.7665 | 28.179<br>6 | (-<br>131) | 32.09  | 31.9578 | 32.07   | 32.0441 | 32.624<br>8 | 32.0089 |
| (112)  | 31.256 | 31.2264 | 31.769<br>8 | (-<br>222) | 33.706 | 33.5274 | 33.6543 | 33.6026 | 33.576<br>1 | 33.5916 |
| (-222) | 33.046 | 33.0354 | 33.452<br>6 | (040)      | 38.871 | 38.4655 | 38.6447 | 38.6536 | 38.613<br>8 | 38.6078 |
| (400)  | 35.71  | 35.6457 | 36.304<br>4 | (222)      | 41.624 | 41.379  | 41.5444 | 41.5179 | 41.389<br>2 | 41.4462 |
| (040)  | 37.785 | 37.7259 | 38.469<br>5 | (241)      | 47.02  | 47.0022 | 47.0366 | 47.5759 | 47.503<br>6 | 47.1037 |
| (-113) | 39.078 | 39.0147 | 39.808<br>4 | (-<br>204) | 52.07  | 52.1428 | 52.1889 | 52.1602 | 52.112<br>6 | 52.1066 |
| (222)  | 40.449 | 40.3448 | 41.144<br>8 | (-<br>440) | 54.547 | 53.4041 | 53.3543 | 53.2541 | 53.289<br>5 | 53.1235 |
| (241)  | 45.673 | 45.79   | 46.599<br>4 | (024)      | 58.438 | 57.9528 | 58.3505 | 58.348  | 58.267<br>7 | 58.3098 |
| (-204) | 51.218 | 51.1844 | 51.793      | (-<br>424) | 60.415 | 60.2242 | 59.6117 | 61.2177 | 61.049<br>3 | 61.1299 |
| (440)  | 52.965 | 52.8436 | 53.964<br>3 |            |        |         |         |         |             |         |
| (024)  | 57.064 | 56.9706 | 57.894<br>6 |            |        |         |         |         |             |         |
| (-424) | 59.324 | 59.2956 | 59.993<br>2 |            |        |         |         |         |             |         |

**Table S2:** Comparison of different bifunctional (ORR/OER) electrocatalytic performances with HEMo@900 material.

| Materials                                     | Electrolyte    | Catalyst loading (mg cm <sup>-2</sup> ) | OER                                        |                                     | Electrolyte                          | Catalyst loading (mg cm <sup>-2</sup> ) | ORR                             |                                     |
|-----------------------------------------------|----------------|-----------------------------------------|--------------------------------------------|-------------------------------------|--------------------------------------|-----------------------------------------|---------------------------------|-------------------------------------|
|                                               |                |                                         | Overpotential (mV) @10 mA cm <sup>-2</sup> | Tafel slope (mV dec <sup>-1</sup> ) |                                      |                                         | Half-wave potential (V vs. RHE) | Tafel slope (mV dec <sup>-1</sup> ) |
| Material [Ref]                                |                |                                         |                                            |                                     |                                      |                                         |                                 |                                     |
| <b>This work (HEMo@900)</b>                   | <b>1 M KOH</b> | <b>0.35</b>                             | <b>318</b>                                 | <b>49.45</b>                        | <b>1 M KOH</b>                       | <b>0.38</b>                             | <b>0.74</b>                     | <b>93.09</b>                        |
| FeNC <sup>1</sup>                             | 0.1 M KOH      | 0.8                                     | 320                                        | 305                                 | 0.5 M H <sub>2</sub> SO <sub>4</sub> | 0.8                                     | 0.72                            | --                                  |
| MnFe <sub>2</sub> O <sub>4</sub> <sup>2</sup> | 0.1 M          | 0.15                                    | 590                                        | --                                  | 0.1 M                                | 0.15                                    | 0.71                            | 71                                  |

|                                                                                                           |              |        |     |       |              |                              |       |        |
|-----------------------------------------------------------------------------------------------------------|--------------|--------|-----|-------|--------------|------------------------------|-------|--------|
|                                                                                                           | KOH          |        |     |       | KOH          |                              |       |        |
| NiFe <sub>2</sub> O <sub>4</sub> <sup>2</sup>                                                             | 1 M<br>KOH   | 0.15   | 410 | --    | 0.1 M<br>KOH | 0.15                         | 0.68  | 57     |
| CoFe <sub>2</sub> O <sub>4</sub> <sup>2</sup>                                                             | 0.1 M<br>KOH | 0.15   | 410 | --    | 0.1 M<br>KOH | 0.15                         | 0.73  | 53     |
| CuCo <sub>2</sub> S <sub>4</sub> NSs <sup>3</sup>                                                         | 0.1 M<br>KOH | 0.2    | 287 | 46    | 0.1 M<br>KOH | 0.2                          | 0.70  | 73     |
| Nickel Cobaltite <sup>4</sup>                                                                             | 0.1 M<br>KOH | 0.20   | 400 | 70    | 0.1 M<br>KOH | 0.20                         | 0.73  | 90     |
| MnFe <sub>2</sub> O <sub>4</sub> <sup>5</sup>                                                             | 0.1 M<br>KOH | 0.0306 | 540 | --    | 0.1 M<br>KOH | 0.0306                       | 0.72  | --     |
| MnO <sub>2</sub> <sup>6</sup>                                                                             | 0.1 M<br>KOH | 0.204  | 610 | 60    | 0.1 M<br>KOH | 0.204<br>mg cm <sup>-2</sup> | 0.56  | 256    |
| nsLaNiO <sub>3</sub> /NC <sup>7</sup>                                                                     | 0.1 M<br>KOH | 0.051  | 430 | 42    | 0.1 M<br>KOH | 0.051                        | 0.64  | --     |
| De-<br>Li(Ni <sub>0.2</sub> Co <sub>0.6</sub> Mn <sub>0.2</sub> )O <sub>2</sub> <sup>8</sup>              | 0.1 M<br>KOH | 0.118  | 310 | 36    | 0.1 M<br>KOH | 0.118                        | 0.71  | --     |
| MnCo <sub>2</sub> O <sub>4.5</sub> <sup>9</sup>                                                           | 0.1 M<br>KOH | 0.2756 | 410 | 144   | 0.1 M<br>KOH | 0.2756                       | 0.72  | --     |
| LSMI <sup>10</sup>                                                                                        | 0.1 M<br>KOH | 0.2    | 440 | 103   | 0.1 M<br>KOH | 0.2                          | 0.73  | --     |
| BaFe <sub>0.8</sub> Co <sub>0.2</sub> O <sub>2.0</sub><br><sub>9</sub> (OH) <sub>0.78</sub> <sup>11</sup> | 0.1 M<br>KOH | 0.3    | 450 | 190   | 0.1 M<br>KOH | 0.3                          | 0.675 | 84     |
| LT-Li <sub>0.5</sub> CoO <sub>2</sub> <sup>12</sup>                                                       | 1 M<br>KOH   | 0.25   | 320 | 60    | 0.1 M<br>KOH | 0.25                         | 0.64  | --     |
| H <sub>2</sub> -CMNO <sup>13</sup>                                                                        | 0.1 M<br>KOH | 0.4    | 550 | 98    | 0.1 M<br>KOH | 0.4                          | 0.68  | 80     |
| LSMF <sup>14</sup>                                                                                        | 1 M<br>KOH   | 0.305  | 610 | 230   | 0.1 M<br>KOH | 0.305                        | 0.73  | 137    |
| LC5N5 <sup>15</sup>                                                                                       | 1 M<br>KOH   | --     | 400 | 73.9  | 0.1 M<br>KOH | --                           | 0.67  | 112    |
| PBSCF-NF <sup>16</sup>                                                                                    | 0.1 M<br>KOH | --     | 300 | 81    | 0.1 M<br>KOH | 0.796                        | 0.69  | 98     |
| Co <sub>3</sub> FeS <sub>1.5</sub> (OH) <sub>6</sub> <sup>17</sup>                                        | 1 M<br>KOH   | --     | 358 | 79    | 0.1 M<br>KOH | --                           | 0.721 | 96     |
| LFP <sup>18</sup>                                                                                         | 1 M<br>KOH   | 0.255  | 460 | 50    | 0.1 M<br>KOH | 0.255                        | 0.66  | 64     |
| DCN-M <sup>19</sup>                                                                                       | 1 M<br>KOH   | 0.2    | 350 | 68.83 | 0.1 M<br>KOH | 0.2                          | 0.864 | 105.68 |
| Co/N-Pg <sup>20</sup>                                                                                     | 0.1 M<br>KOH | 0.35   | --  | 70    | 0.1 M<br>KOH | 0.35                         | 0.82  | 61     |

|                                                                 |            |       |     |       |            |       |       |       |
|-----------------------------------------------------------------|------------|-------|-----|-------|------------|-------|-------|-------|
| Co NP/NC <sup>21</sup>                                          | 0.1 M KOH  | 0.5   | 430 | --    | 0.1 M KOH  | 0.5   | 0.8   | --    |
| Co@CNTs <sup>22</sup>                                           | 0.1 M NaOH | 0.450 | 340 | 72    | 0.1 M KOH  | 0.450 | 0.9   | 78    |
| Co@NSCNT <sup>23</sup>                                          | 0.1 M KOH  | --    | 520 | 154   | 0.1 M KOH  | --    | 0.906 | --    |
| FeCo/NSC <sup>24</sup>                                          | 0.1 M KOH  | 0.42  | 325 | 99.15 | 0.1 M KOH  | 0.42  | 0.82  | 69.75 |
| Co/MoC@N-C <sup>25</sup>                                        | 1 M KOH    | 0.850 | 290 | 90    | 1 M KOH    | 0.850 | 0.824 | 93.26 |
| CoO <sub>x</sub> /CeO <sub>2</sub> /RGO <sup>26</sup>           | 0.1 M KOH  | 0.35  | 360 | 86    | 0.1 M KOH  | 0.35  | 0.83  | 54    |
| ZnCoMnO <sub>4</sub> /N-rGO <sup>27</sup>                       | 0.1 M KOH  | --    | 450 | 158   | 0.1 M KOH  | --    | 0.83  | 75    |
| G@N-MoS <sub>2</sub> <sup>28</sup>                              | 0.1 M KOH  | 0.25  | 390 | --    | 0.1 M KOH  | 0.25  | 0.716 | --    |
| AuIr/C <sup>29</sup>                                            | 1 M KOH    | --    | 394 | --    | 0.1 M NaOH | --    | 0.774 | --    |
| NiCoO <sub>2</sub> /CNTs <sup>30</sup>                          | 0.1 M KOH  | 0.3   | 430 | 156   | 0.1 M KOH  | 0.3   | 0.67  | --    |
| Ni <sub>3</sub> FeN/NRGO <sup>31</sup>                          | 0.1 M KOH  | 0.1   | 400 | --    | 0.1 M KOH  | 0.1   | 0.70  | --    |
| Ni/NiO/NiCo <sub>2</sub> O <sub>4</sub> /N-CNT-As <sup>32</sup> | 0.1 M KOH  | 0.240 | 280 | 45    | 0.1 M KOH  | 0.240 | 0.74  | --    |
| FeO <sub>x</sub> @N-PHCS <sup>33</sup>                          | 0.1 M KOH  | 0.25  | 340 | 162   | 0.1 M KOH  | 0.25  | 0.86  | --    |

## References:

1. K. Mamtani, D. Jain, A. C. Co and U. S. Ozkan, *Energy & Fuels*, 2017, **31**, 6541-6547.
2. C. Si, Y. Zhang, C. Zhang, H. Gao, W. Ma, L. Lv and Z. Zhang, *Electrochimica Acta*, 2017, **245**, 829-838.
3. Y. Li, J. Yin, L. An, M. Lu, K. Sun, Y.-Q. Zhao, F. Cheng and P. Xi, *Nanoscale*, 2018, **10**, 6581-6588.
4. D. U. Lee, M. G. Park, Z. P. Cano, W. Ahn and Z. Chen, *ChemSusChem*, 2018, **11**, 406-414.
5. Y. Zhou, Y. Du, S. Xi and Z. J. Xu, *Electrocatalysis*, 2017, **9**, 287-292.
6. K. Selvakumar, S. M. S. Kumar, R. Thangamuthu, P. Rajput, D. Bhattacharyya and S. N. Jha, *ChemElectroChem*, 2018, **5**, 3980-3990.
7. W. G. Hardin, D. A. Slanac, X. Wang, S. Dai, K. P. Johnston and K. J. Stevenson, *The Journal of Physical Chemistry Letters*, 2013, **4**, 1254-1259.
8. Y. Zou, G. Chang, Y. Jia, R. Cai, S. Chen, Y. Xia, W. Theis, D. Yang and X. Yao, *Energy Storage Materials*, 2018, **15**, 202-208.

9. Z. Bai, J. Heng, Q. Zhang, L. Yang and F. Chang, *Advanced Energy Materials*, 2018, **8**.
10. L. Yan, Y. Lin, X. Yu, W. Xu, T. Salas, H. Smallidge, M. Zhou and H. Luo, *ACS Applied Materials & Interfaces*, 2017, **9**, 23820-23827.
11. A. I. Waidha, L. Ni, J. Ali, M. Lepple, M. Donzelli, S. Dasgupta, S. Wollstadt, L. Alff, U. I. Kramm and O. Clemens, *Journal of Materials Chemistry A*, 2020, **8**, 616-625.
12. T. Maiyalagan, K. A. Jarvis, S. Therese, P. J. Ferreira and A. Manthiram, *Nature Communications*, 2014, **5**.
13. Y.-Q. Lyu and F. Ciucci, *ACS Applied Materials & Interfaces*, 2017, **9**, 35829-35836.
14. R.-h. Yuan, Y. He, W. He, M. Ni and M. K. H. Leung, *Applied Energy*, 2019, **251**.
15. H. Wang, W. Xu, S. Richins, K. Liaw, L. Yan, M. Zhou and H. Luo, *Electrochimica Acta*, 2019, **296**, 945-953.
16. Y. Bu, O. Gwon, G. Nam, H. Jang, S. Kim, Q. Zhong, J. Cho and G. Kim, *ACS Nano*, 2017, **11**, 11594-11601.
17. H. F. Wang, C. Tang, B. Wang, B. Q. Li and Q. Zhang, *Advanced Materials*, 2017, **29**.
18. Z. Li, L. Lv, J. Wang, X. Ao, Y. Ruan, D. Zha, G. Hong, Q. Wu, Y. Lan, C. Wang, J. Jiang and M. Liu, *Nano Energy*, 2018, **47**, 199-209.
19. D. Chen, W. Cao, J. Liu, J. Wang, X. Li and L. Jiang, *Journal of Energy Chemistry*, 2021, **59**, 47-54.
20. Y. Tian, L. Xu, J. Bao, J. Qian, H. Su, H. Li, H. Gu, C. Yan and H. Li, *Journal of Energy Chemistry*, 2019, **33**, 59-66.
21. J. Zhao, F. Rong, Y. Yao, W. Fan, M. Li and Q. Yang, *Journal of Energy Chemistry*, 2018, **27**, 1261-1267.
22. J. Jiao, Y. Pan, B. Wang, W. Yang, S. Liu and C. Zhang, *Journal of Energy Chemistry*, 2021, **53**, 364-371.
23. T. Oh, K. Kim and J. Kim, *Journal of Energy Chemistry*, 2019, **38**, 60-67.
24. S. Chang, H. Zhang and Z. Zhang, *Journal of Energy Chemistry*, 2021, **56**, 64-71.
25. H. Huang, L. Kong, M. Liu, J. He, W. Shuang, Y. Xu and X.-H. Bu, *Journal of Energy Chemistry*, 2021, **59**, 538-546.
26. H. Zhong, L. Alberto Estudillo-Wong, Y. Gao, Y. Feng and N. Alonso-Vante, *Journal of Energy Chemistry*, 2021, **59**, 615-625.
27. W. Liu, D. Rao, J. Bao, L. Xu, Y. Lei and H. Li, *Journal of Energy Chemistry*, 2021, **57**, 428-435.
28. C. Tang, L. Zhong, B. Zhang, H.-F. Wang and Q. Zhang, *Advanced Materials*, 2018, **30**.
29. L. Yuan, Z. Yan, L. Jiang, E. Wang, S. Wang and G. Sun, *Journal of Energy Chemistry*, 2016, **25**, 805-810.
30. L. Ma, H. Zhou, Y. Sun, S. Xin, C. Xiao, A. Kumatani, T. Matsue, P. Zhang, S. Ding and F. Li, *Electrochimica Acta*, 2017, **252**, 338-349.
31. Y. Fan, S. Ida, A. Staykov, T. Akbay, H. Hagiwara, J. Matsuda, K. Kaneko and T. Ishihara, *Small*, 2017, **13**.
32. N. Ma, Y. Jia, X. Yang, X. She, L. Zhang, Z. Peng, X. Yao and D. Yang, *Journal of Materials Chemistry A*, 2016, **4**, 6376-6384.
33. R. Hao, J.-T. Ren, X.-W. Lv, W. Li, Y.-P. Liu and Z.-Y. Yuan, *Journal of Energy Chemistry*, 2020, **49**, 14-21.
